# Supplementary material
Source: PubMed Central journal article supplement (PMC4344457)
Supplement: 13_034_Julovi.Suppl.pdf [file 13_034_Julovi.Suppl.pdf]

Supplemental Data

Activated Protein C Inhibits Proliferation and Tumor Necrosis Factor  $\alpha$ -Stimulated Activation of p38, c-Jun NH2-Terminal Kinase (JNK) and Akt in Rheumatoid Synovial Fibroblasts

Sohel M Julovi,<sup>1,2</sup> Kaitlin Shen,<sup>1</sup> Kelly McKelvey,<sup>1</sup> Nikita Minhas,<sup>1</sup> Lyn March,<sup>1</sup> and Christopher J Jackson<sup>1\*</sup>

Online address: <http://www.molmed.org>

The Feinstein Institute for Medical Research North Shore LIJ

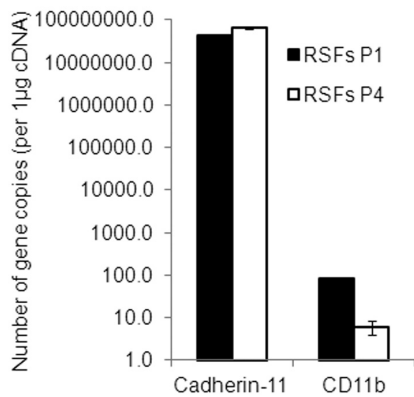

**Supplementary Figure S1.** Expression of cadherin-11 and CD11b in cultured RSFs by quantitative reverse transcriptase-polymerase chain reaction (qRT-PCR). Passage depicted as P.

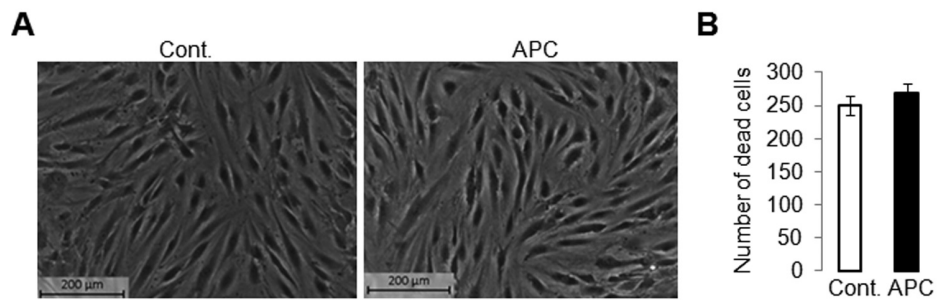

**Supplementary Figure S2.** Similar pattern of RSFs morphology (A) and cell death (B) between control and APC treated groups. Scale bar, 200  $\mu$ m. Cont., control.

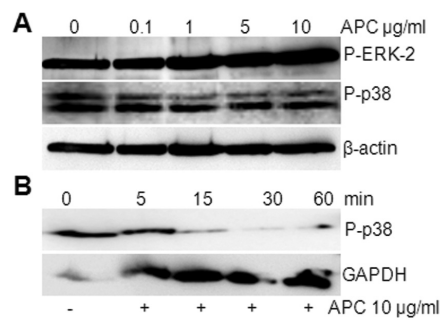

**Supplementary Figure S3.** Effects of APC on phosphorylated (P) ERK-2 and P-p38. A). RSFs were treated with increasing doses of APC for 30 min and P-ERK-2 and P-p38 were assessed by western blotting.  $\beta$ -actin was used as a loading control. B) APC (10  $\mu$ g/ml) was added to RSFs for up to 60 min and P-p38 measured by western blotting. GAPDH was used as a loading control.

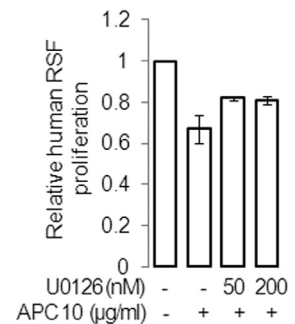

**Supplementary Figure S4.** Blockade of antiproliferative effects of APC on RSFs by U0126. RSFs were pre-treated for 1 h with-out or with U0126 (50 and 200 nM, non toxic to RSFs), then treated with or without APC (10  $\mu$ g/ml) for 24 h. Proliferation was measured by crystal violet assay. Controls were defined as 1. Values shown are mean  $\pm$  SD, n=2, 4 wells for each patient in each group.
